CORRECTION

# Correction: A Multi-country Study of the Household Willingness-to-Pay for Dengue Vaccines: Household Surveys in Vietnam, Thailand, and Colombia

**Jung-Seok Lee, Vittal Mogasale, Jacqueline K. Lim, Mabel Carabali, Chukiak Sirivichayakul, Dang Duc Anh, Kang-Sung Lee, Vu Dinh Thiem, Kriengsak Limkittikul, Le Huu Tho, Ivan D. Velez, Jorge E. Osorio, Pornthep Chanthavanich, Luiz J. da Silva, Brian A. Maskery**

There is an omission in the Acknowledgements section. The correct Acknowledgments statement is as follows: We would like to thank all members in our local sites for their support and collaboration. We are highly grateful to the Dengue Vaccine Initiative (DVI) team and would like to acknowledge the excellent team work. The International Vaccine Institute (IVI) also acknowledges the Governments of the Republic of Korea and Sweden for their core support to IVI.

## Reference

1. Lee J-S, Mogasale V, Lim JK, Carabali M, Sirivichayakul C, Anh DD, et al. (2015) A Multi-country Study of the Household Willingness-to-Pay for Dengue Vaccines: Household Surveys in Vietnam, Thailand, and Colombia. *PLoS Negl Trop Dis* 9(6): e0003810. doi: [10.1371/journal.pntd.0003810](https://doi.org/10.1371/journal.pntd.0003810) PMID: [26030922](https://pubmed.ncbi.nlm.nih.gov/26030922/)

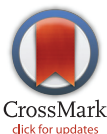

## OPEN ACCESS

**Citation:** Lee J-S, Mogasale V, Lim JK, Carabali M, Sirivichayakul C, Anh DD, et al. (2015) Correction: A Multi-country Study of the Household Willingness-to-Pay for Dengue Vaccines: Household Surveys in Vietnam, Thailand, and Colombia. *PLoS Negl Trop Dis* 9(6): e0003886. doi:10.1371/journal.pntd.0003886

**Published:** June 24, 2015

**Copyright:** © 2015 Lee et al. This is an open access article distributed under the terms of the [Creative Commons Attribution License](https://creativecommons.org/licenses/by/4.0/), which permits unrestricted use, distribution, and reproduction in any medium, provided the original author and source are credited.
